# Supplementary material for: Tributyrin Attenuates Metabolic and Inflammatory Changes Associated with Obesity through a GPR109A-Dependent Mechanism
Source: PubMed Central journal article supplement (PMC7563536; doi:10.3390/cells9092007), 2020-09-01
Supplement: cells-09-02007-s001.pdf [file cells-09-02007-s001.pdf]

## SUPPLEMENTARY FIGURES

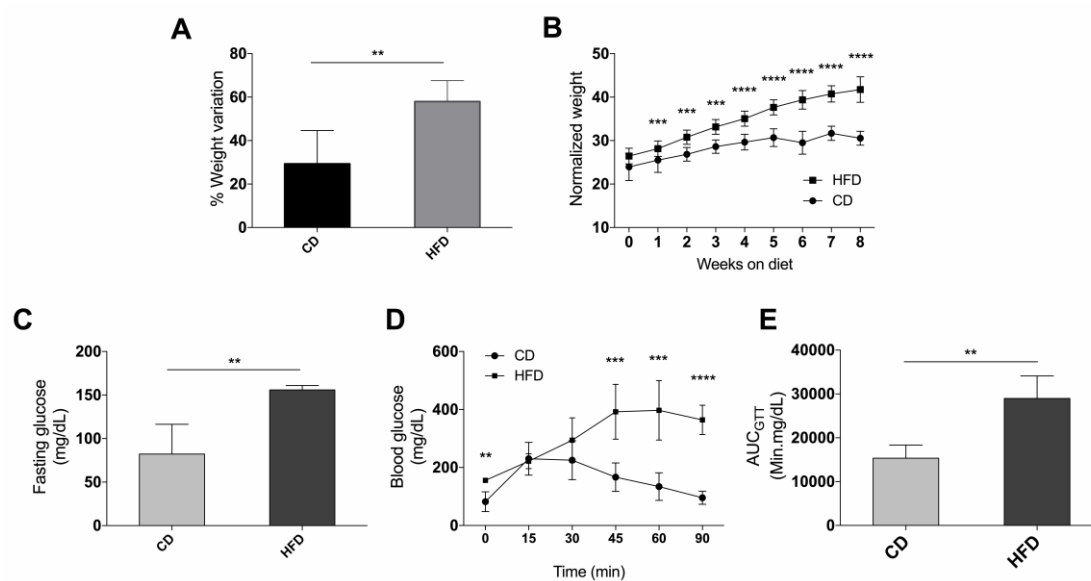

**Figure S1.** Mice on a HFD for 8-weeks presented a significant increase in body weight and an impairment in glucose metabolism compared to mice on control diet (CD, AIN93M). Body weight (BW) variation during the experimental protocol (A, B) (6-7 mice per group). Glucose quantification in samples from 6 h fasted mice (n = 4-6 mice per group) (C). Glucose Tolerance Test was performed at the 8th week of the protocol (n = 4-6 mice per group) (D). Incremental area of blood glucose in the GTT (E) (n = 5 mice per group). \*\*\*\* $p < 0.0001$ , \*\*\* $p < 0.001$ , \*\* $p < 0.01$  CD vs HFD, Student's t-test (B and D) or Mann-Whitney (A, C and E). Data are presented as mean  $\pm$  SD.

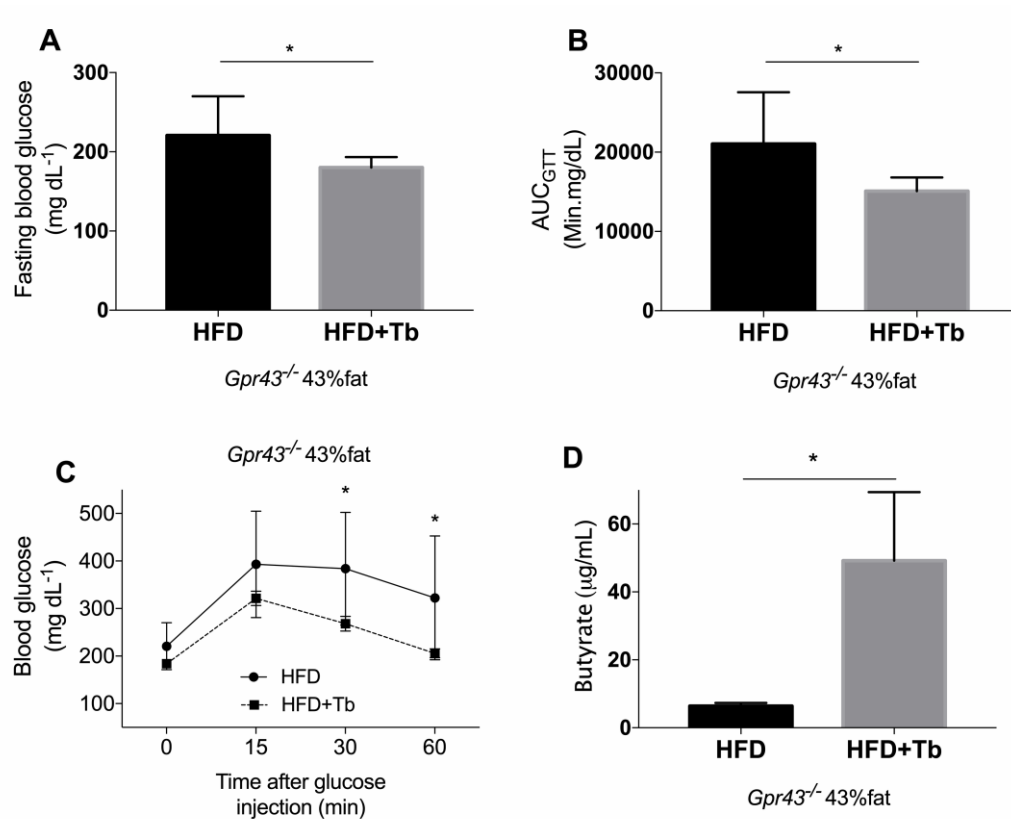

**Figure S2.** Tributyrin improved glucose homeostasis in obese mice through a GPR43 independent mechanism. (A) Glucose measurements in samples from WT and *Gpr43*<sup>-/-</sup> mice (n = 8-9 mice per group). (B) Incremental area of blood glucose (GTT) at the 12th week of the protocol in WT and *Gpr43*<sup>-/-</sup> (n = 9 mice per group). (C) GTT curves are presented (n = 9 mice per group). (D) Butyrate concentrations in blood samples measured at the end of the protocol (n = 5 mice per group). \**p* < 0.05. HFD vs HFD+Tb, Student's t-test (A, C and D) or Mann-Whitney (B). Data are presented as mean ± SD.

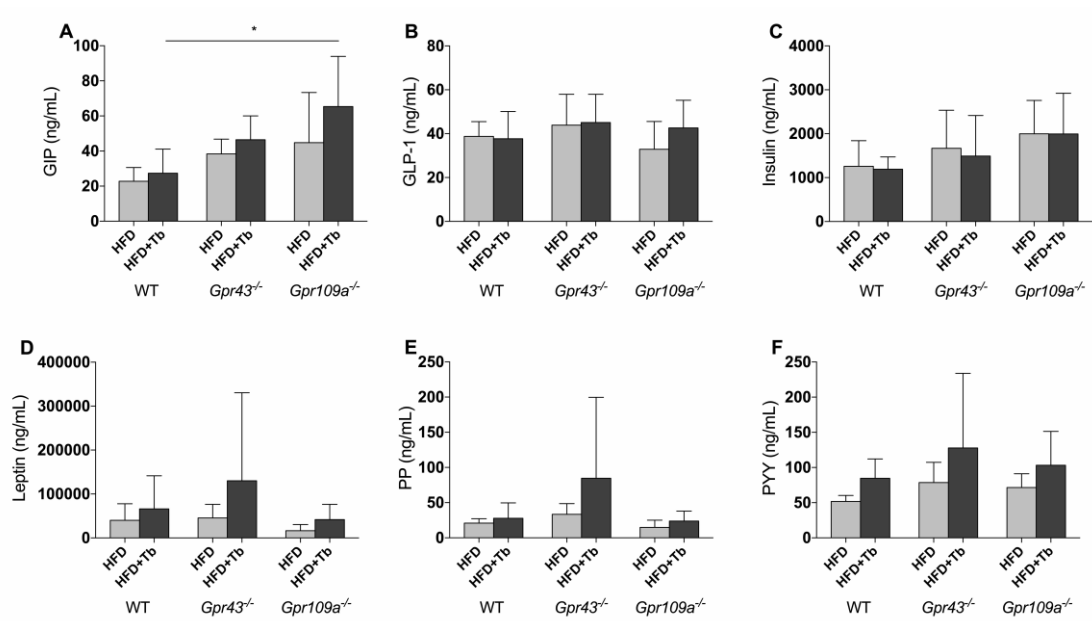

**Figure S3.** Quantification of hormones in serum samples from WT, *Gpr43*<sup>-/-</sup> and *Gpr109a*<sup>-/-</sup> mice. (A) Gastric inhibitory peptide (GIP), (B) Glucagon-like peptide-1 (GLP-1), (C) Insulin, (D) Leptin, (E) Pancreatic polypeptide (PP) and (F) Peptide YY (PYY) were measured in serum samples from WT, *Gpr43*<sup>-/-</sup> and *Gpr109a*<sup>-/-</sup> mice treated or not with Tb. Results are presented as mean  $\pm$  SD (n = 5-10 samples per group). \* $p < 0.05$ . Results analyzed by Two-way ANOVA, Bonferroni as post-test.

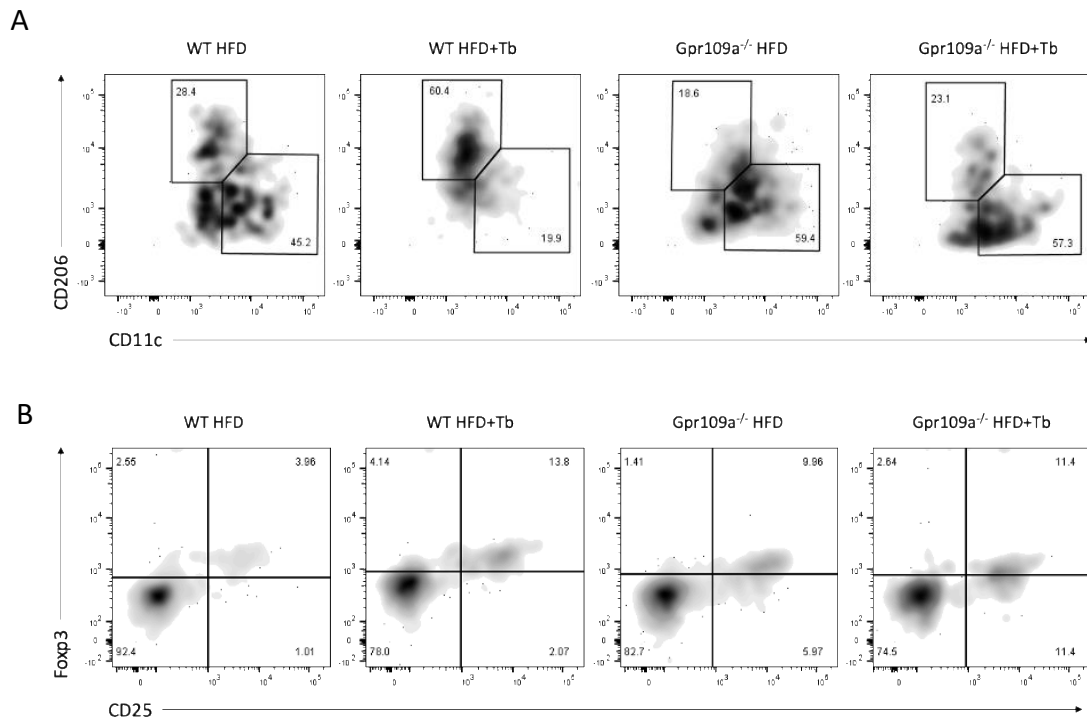

**Figure 4.** Representative flow cytometry (FACS) plots of macrophages populations and Treg cells analysis performed with the WAT of WT and *Gpr109a*<sup>-/-</sup> mice treated or not with Tb. **(A)** FACS plots for CD11c<sup>+</sup> M1 and CD206<sup>+</sup> M2 macrophages gated from F4/80<sup>hi</sup>CD11b<sup>hi</sup> population in the eWAT of mice treated or not with tributyrin. **(B)** CD25<sup>+</sup>Fcγ3<sup>+</sup> regulatory T cells gated from CD4<sup>+</sup> population in the eWAT of mice treated or not with tributyrin.

**Table S1.** Sequence of the primers used in the study.

| <b>Gene</b>                  |       | <b>Sequence</b>                |
|------------------------------|-------|--------------------------------|
| <i>Adiponectin</i>           | sense | TCT TAA TCC TGC CCA GTC ATG C  |
|                              | anti  | TCC AAC ATC TCC TGT CTC ACC C  |
| <i>Arginase</i>              | sense | GGA AGA GTC AGT GTG GTG CTG G  |
|                              | anti  | CAG GAG AAA GGA CAC AGG TTG C  |
| <i>Cd11c</i>                 | sense | AGC AGG TGG CAT TGT GGG AC     |
|                              | anti  | ACC TCT GTT CTC CTC CTC        |
| <i>F4/80</i>                 | sense | CCT GAA CAT GCA ACC TGC CAC    |
|                              | anti  | GGG CAT GAG CAG CTG TAG GAT C  |
| <i>Il1<math>\beta</math></i> | sense | GGC AGC TAC CTG TGT CTT TCC C  |
|                              | anti  | ATA TGG GTC CGA CAG CAC GAG    |
| <i>Il6</i>                   | sense | CGG AGA GGA GAC TTC ACA GAG    |
|                              | anti  | GGT AGC ATC CAT CAT TTC TTT G  |
| <i>iNOS</i>                  | sense | CGG CAA ACC CAA GGT CTA CG     |
|                              | anti  | CAC CTG CTC CTC GCT CAA GTT C  |
| <i>Mcp-1</i>                 | sense | ACC TGG ATC GGA ACC AAA TGA G  |
|                              | anti  | GAA GTG CTT GAG GTG GTT GTG G  |
| <i>Mgl-2</i>                 | sense | TCA AGA ATT GGA GGC CAC TGC    |
|                              | anti  | AGT GGG CTG AGC TGG CTT TG     |
| <i>Srebp</i>                 | sense | CAG TCA CCA GCT TCA GTC CAG G  |
|                              | anti  | CTG CTC AGG TCA TGT TGG AAA CC |
| <i>Tnfa</i>                  | sense | TCT TCT CAT TCC TGC TTG TGG C  |
|                              | anti  | CAC TTG GTG GTT TGC TAC GAC G  |
| <i>Ubiquitin c</i>           | sense | AGC CCA GTG TTA CCA CCA AG     |
|                              | anti  | ACC CAA GAA CAA GCA CAA GG     |
| $\beta$ 2m                   | sense | CCC CAC TGA GAC TGA TAC ATA CG |
|                              | anti  | CGA TCC CAG TAG ACG GTC TTG    |
